# Supplementary material for: Association Between Preceding Viral Respiratory Infection and Subsequent Respiratory Illnesses Among Children: A Prospective Cohort Study in the Philippines
Source: PubMed Central journal article supplement — J Infect Dis. 2018 Sep 5;219(2):197–205. doi: 10.1093/infdis/jiy515 (PMC6306022; doi:10.1093/infdis/jiy515), 2018-09-05
Supplement: jiy515_suppl_supplementary_material.pdf [file jiy515_suppl_supplementary_material.pdf]

## Supplementary Material

**Supplementary Table 1:** Sequence information of primers and probes used to detect viruses.

| Virus         | PCR protocol | Gene  | Primer/probe   | Sequence (5'-3')                               |
|---------------|--------------|-------|----------------|------------------------------------------------|
| AdV           | PCR          | Hexon | Forward primer | CAACACCTAYGASTACATGAA                          |
|               |              |       | Reverse primer | KATGGGTARAGCATGTT                              |
| EV/RhV        | RT-PCR       | 5'UTR | Forward primer | CAAGCACTTCTGTTTCCC                             |
|               |              |       | Reverse primer | CACGGACACCCAAAGTAGT                            |
| hMPV          | RT-qPCR      | N     | Forward primer | CATATAAGCATGCTATATTTAAAGAGTCTCA                |
|               |              |       | Reverse primer | CCTATYCTGCAGCATATTTGTAATCA G                   |
|               |              |       | Probe          | FAM-CAACHGCAGTRACA CYTCATCATRCA-BHQ1           |
| IFV-A H1N1pdm | RT-qPCR      | HA    | Forward primer | AGAAAAGAAATGTAACAGTAACACACTCTGT                |
|               |              |       | Reverse primer | TGTTCCACAATGTARGACCAT                          |
|               |              |       | Probe          | FAM-CAGCCAGCAATRTTRCATTACC-MGB                 |
| IFV-A H3N2    | RT-qPCR      | HA    | Forward primer | CTATTGGACAATAGTAAAACCGGGRGA                    |
|               |              |       | Reverse primer | GTCATTGGGRATGCTCCATTTGG                        |
|               |              |       | Probe          | FAM-AAGTAACCCCKAGGAGCAATTAG-MGB                |
| IFV-B         | RT-qPCR      | NS    | Forward primer | GGAGCAACCAATGCCAC                              |
|               |              |       | Reverse primer | GKTAGGCGGCTTGACCAG                             |
|               |              |       | Probe          | FAM-ATAAACTTTGAAGCAGGAAT-MGB                   |
| PIV-1         | RT-PCR       | HN    | Forward primer | CCGGTAATTTCTCATACTATG                          |
|               |              |       | Reverse primer | CCTTGGAGCGGAGTTGTTAAG                          |
| PIV-2         | RT-PCR       | HN    | Forward primer | AACAATCTGCTGCAGCATT                            |
|               |              |       | Reverse primer | ATGTCAGACAATGGGCAAAT                           |
| PIV-3         | RT-PCR       | HN    | Forward primer | CTCGAGTTGTCAGGATATAG                           |
|               |              |       | Reverse primer | CTTTGGGAGTTGAACACAGTT                          |
| PIV-4         | RT-PCR       | P     | Forward primer | CCTGAACGGTTGCAYTCAGG                           |
|               |              |       | Reverse primer | TTGCATCAAGAAATGAGTCCT                          |
| RSV           | RT-qPCR      | N     | Forward primer | GCTCTTAGCAAAGTCAAGTTAATGATACA                  |
|               |              |       | Reverse primer | GTTTTGCACATCATAATTRGGAGT                       |
|               |              |       | Probe          | VIC-CTRTCATCCAGCAAATAYACYATCCAACGKAGYACAGG-MGB |

**Supplementary Table 2: Demographic and biological characteristics of children with preceding infections and matched controls.**

Part 1

|                            |          | AdV                                 | 97%                                         |                  | EV-D68                              | 87%                                         |                  | EVs other than D68                  | 92%                                         |                  | hMPV                                | 91%                                         |                  |
|----------------------------|----------|-------------------------------------|---------------------------------------------|------------------|-------------------------------------|---------------------------------------------|------------------|-------------------------------------|---------------------------------------------|------------------|-------------------------------------|---------------------------------------------|------------------|
|                            |          | "children with preceding infection" | matched "children with preceding infection" | matched controls | "children with preceding infection" | matched "children with preceding infection" | matched controls | "children with preceding infection" | matched "children with preceding infection" | matched controls | "children with preceding infection" | matched "children with preceding infection" | matched controls |
| Total number               |          | 91                                  | 88                                          | 88               | 46                                  | 40                                          | 40               | 52                                  | 48                                          | 48               | 128                                 | 116                                         | 116              |
| Gender                     | Female   | 46 (51%)                            | 44 (50%)                                    | 47 (53%)         | 22 (48%)                            | 19 (48%)                                    | 18 (45%)         | 20 (38%)                            | 18 (38%)                                    | 20 (42%)         | 61 (48%)                            | 53 (46%)                                    | 58 (50%)         |
|                            | Male     | 45 (49%)                            | 44 (50%)                                    | 41 (47%)         | 24 (52%)                            | 21 (53%)                                    | 22 (55%)         | 32 (62%)                            | 30 (63%)                                    | 28 (58%)         | 67 (52%)                            | 63 (54%)                                    | 58 (50%)         |
| Age                        | 0-5M     | 5 (5%)                              | 5 (6%)                                      | 4 (5%)           | 5 (11%)                             | 0 (0%)                                      | 2 (5%)           | 5 (10%)                             | 2 (4%)                                      | 2 (4%)           | 18 (14%)                            | 11 (9%)                                     | 12 (10%)         |
|                            | 6-11M    | 19 (21%)                            | 18 (20%)                                    | 14 (16%)         | 9 (20%)                             | 9 (23%)                                     | 7 (18%)          | 12 (23%)                            | 11 (23%)                                    | 9 (19%)          | 23 (18%)                            | 23 (20%)                                    | 19 (16%)         |
|                            | 1Y       | 31 (34%)                            | 30 (34%)                                    | 33 (38%)         | 13 (28%)                            | 12 (30%)                                    | 10 (25%)         | 11 (21%)                            | 11 (23%)                                    | 14 (29%)         | 34 (27%)                            | 32 (28%)                                    | 35 (30%)         |
|                            | 2Y       | 11 (12%)                            | 11 (13%)                                    | 13 (15%)         | 12 (26%)                            | 12 (30%)                                    | 14 (35%)         | 10 (19%)                            | 10 (21%)                                    | 9 (19%)          | 20 (16%)                            | 20 (17%)                                    | 17 (15%)         |
|                            | 3Y       | 11 (12%)                            | 11 (13%)                                    | 13 (15%)         | 7 (15%)                             | 7 (18%)                                     | 7 (18%)          | 8 (15%)                             | 8 (17%)                                     | 8 (17%)          | 19 (15%)                            | 17 (15%)                                    | 23 (20%)         |
|                            | 4Y       | 14 (15%)                            | 13 (15%)                                    | 11 (13%)         | 0 (0%)                              | 0 (0%)                                      | 0 (0%)           | 6 (12%)                             | 6 (13%)                                     | 6 (13%)          | 14 (11%)                            | 13 (11%)                                    | 10 (9%)          |
| Height-for-age Z-score     | ≥ -2     | 54 (59%)                            | 53 (60%)                                    | 53 (60%)         | 28 (61%)                            | 22 (55%)                                    | 26 (65%)         | 36 (69%)                            | 32 (67%)                                    | 31 (65%)         | 92 (72%)                            | 83 (72%)                                    | 84 (72%)         |
|                            | < -2     | 37 (41%)                            | 35 (40%)                                    | 35 (40%)         | 18 (39%)                            | 18 (45%)                                    | 14 (35%)         | 16 (31%)                            | 16 (33%)                                    | 17 (35%)         | 36 (28%)                            | 33 (28%)                                    | 32 (28%)         |
| Low birth weight           | <2,500 g | 9 (13%)                             | 8 (12%)                                     | 5 (6%)           | 8 (20%)                             | 7 (20%)                                     | 4 (11%)          | 5 (12%)                             | 5 (13%)                                     | 2 (4%)           | 18 (17%)                            | 13 (14%)                                    | 8 (7%)           |
| Socioeconomic status score | 37-93    | 20 (22%)                            | 20 (23%)                                    | 24 (27%)         | 13 (28%)                            | 11 (28%)                                    | 10 (25%)         | 15 (29%)                            | 15 (31%)                                    | 14 (29%)         | 34 (27%)                            | 28 (24%)                                    | 29 (25%)         |
|                            | 25-36    | 37 (41%)                            | 36 (41%)                                    | 32 (36%)         | 13 (28%)                            | 11 (28%)                                    | 13 (33%)         | 16 (31%)                            | 14 (29%)                                    | 14 (29%)         | 44 (34%)                            | 40 (34%)                                    | 39 (34%)         |
|                            | 0-24     | 34 (37%)                            | 20 (23%)                                    | 32 (36%)         | 20 (43%)                            | 11 (28%)                                    | 17 (43%)         | 21 (40%)                            | 15 (31%)                                    | 20 (42%)         | 50 (39%)                            | 28 (24%)                                    | 48 (41%)         |

Percentage values next to the virus name show the success rate of matching.

Part 2

|                            |          | IFV-A                               | 95%                                         |                  | IFV-B                               | 88%                                         |                  | PIV-1                               | 93%                                         |                  | PIV-2                               | 90%                                         |                  |
|----------------------------|----------|-------------------------------------|---------------------------------------------|------------------|-------------------------------------|---------------------------------------------|------------------|-------------------------------------|---------------------------------------------|------------------|-------------------------------------|---------------------------------------------|------------------|
|                            |          | "children with preceding infection" | matched "children with preceding infection" | matched controls | "children with preceding infection" | matched "children with preceding infection" | matched controls | "children with preceding infection" | matched "children with preceding infection" | matched controls | "children with preceding infection" | matched "children with preceding infection" | matched controls |
| Total number               |          | 199                                 | 189                                         | 189              | 131                                 | 115                                         | 115              | 148                                 | 138                                         | 138              | 42                                  | 38                                          | 38               |
| Gender                     | Female   | 77 (39%)                            | 73 (39%)                                    | 75 (40%)         | 53 (40%)                            | 50 (43%)                                    | 50 (43%)         | 63 (43%)                            | 58 (42%)                                    | 56 (41%)         | 26 (62%)                            | 24 (63%)                                    | 23 (61%)         |
|                            | Male     | 122 (61%)                           | 116 (61%)                                   | 114 (60%)        | 78 (60%)                            | 65 (57%)                                    | 65 (57%)         | 85 (57%)                            | 80 (58%)                                    | 82 (59%)         | 16 (38%)                            | 14 (37%)                                    | 15 (39%)         |
| Age                        | 0-5M     | 7 (4%)                              | 5 (3%)                                      | 1 (1%)           | 9 (7%)                              | 5 (4%)                                      | 2 (2%)           | 8 (5%)                              | 4 (3%)                                      | 6 (4%)           | 3 (7%)                              | 1 (3%)                                      | 2 (5%)           |
|                            | 6-11M    | 28 (14%)                            | 25 (13%)                                    | 32 (17%)         | 16 (12%)                            | 14 (12%)                                    | 14 (12%)         | 26 (18%)                            | 23 (17%)                                    | 20 (14%)         | 7 (17%)                             | 6 (16%)                                     | 3 (8%)           |
|                            | 1Y       | 41 (21%)                            | 41 (22%)                                    | 36 (19%)         | 19 (15%)                            | 17 (15%)                                    | 22 (19%)         | 42 (28%)                            | 41 (30%)                                    | 45 (33%)         | 8 (19%)                             | 8 (21%)                                     | 14 (37%)         |
|                            | 2Y       | 53 (27%)                            | 52 (28%)                                    | 55 (29%)         | 28 (21%)                            | 26 (23%)                                    | 24 (21%)         | 34 (23%)                            | 32 (23%)                                    | 29 (21%)         | 13 (31%)                            | 12 (32%)                                    | 8 (21%)          |
|                            | 3Y       | 39 (20%)                            | 37 (20%)                                    | 35 (19%)         | 26 (20%)                            | 23 (20%)                                    | 27 (23%)         | 20 (14%)                            | 20 (14%)                                    | 21 (15%)         | 5 (12%)                             | 5 (13%)                                     | 7 (18%)          |
|                            | 4Y       | 31 (16%)                            | 29 (15%)                                    | 30 (16%)         | 33 (25%)                            | 30 (26%)                                    | 26 (23%)         | 18 (12%)                            | 18 (13%)                                    | 17 (12%)         | 6 (14%)                             | 6 (16%)                                     | 4 (11%)          |
| Height-for-age Z-score     | ≥ -2     | 131 (66%)                           | 123 (65%)                                   | 127 (67%)        | 84 (64%)                            | 70 (61%)                                    | 72 (63%)         | 107 (72%)                           | 100 (72%)                                   | 97 (70%)         | 19 (45%)                            | 17 (45%)                                    | 23 (61%)         |
|                            | < -2     | 68 (34%)                            | 66 (35%)                                    | 62 (33%)         | 47 (36%)                            | 45 (39%)                                    | 43 (37%)         | 41 (28%)                            | 38 (28%)                                    | 41 (30%)         | 23 (55%)                            | 21 (55%)                                    | 15 (39%)         |
| Low birth weight           | <2,500 g | 20 (13%)                            | 19 (13%)                                    | 19 (11%)         | 13 (14%)                            | 10 (12%)                                    | 13 (12%)         | 27 (22%)                            | 24 (21%)                                    | 9 (7%)           | 7 (19%)                             | 6 (18%)                                     | 7 (19%)          |
| Socioeconomic status score | 37-93    | 41 (21%)                            | 39 (21%)                                    | 36 (19%)         | 32 (24%)                            | 28 (24%)                                    | 34 (30%)         | 47 (32%)                            | 40 (29%)                                    | 40 (29%)         | 4 (10%)                             | 4 (11%)                                     | 4 (11%)          |
|                            | 25-36    | 72 (36%)                            | 68 (36%)                                    | 68 (36%)         | 46 (35%)                            | 39 (34%)                                    | 38 (33%)         | 52 (35%)                            | 50 (36%)                                    | 48 (35%)         | 19 (45%)                            | 17 (45%)                                    | 18 (47%)         |
|                            | 0-24     | 86 (43%)                            | 39 (21%)                                    | 85 (45%)         | 53 (40%)                            | 28 (24%)                                    | 43 (37%)         | 49 (33%)                            | 40 (29%)                                    | 50 (36%)         | 19 (45%)                            | 4 (11%)                                     | 16 (42%)         |

Part 3

|                            |          | PIV-3                               | 90%                                         |                  | PIV-4                               | 93%                                         |                  | RhV-A                               | 83%                                         |                  | RhV-B                               | 94%                                         |                  |
|----------------------------|----------|-------------------------------------|---------------------------------------------|------------------|-------------------------------------|---------------------------------------------|------------------|-------------------------------------|---------------------------------------------|------------------|-------------------------------------|---------------------------------------------|------------------|
|                            |          | "children with preceding infection" | matched "children with preceding infection" | matched controls | "children with preceding infection" | matched "children with preceding infection" | matched controls | "children with preceding infection" | matched "children with preceding infection" | matched controls | "children with preceding infection" | matched "children with preceding infection" | matched controls |
| Total number               |          | 136                                 | 122                                         | 122              | 55                                  | 51                                          | 51               | 408                                 | 338                                         | 338              | 62                                  | 58                                          | 58               |
| Gender                     | Female   | 68 (50%)                            | 60 (49%)                                    | 56 (46%)         | 35 (64%)                            | 32 (63%)                                    | 32 (63%)         | 190 (47%)                           | 155 (46%)                                   | 153 (45%)        | 31 (50%)                            | 28 (48%)                                    | 26 (45%)         |
|                            | Male     | 68 (50%)                            | 62 (51%)                                    | 66 (54%)         | 20 (36%)                            | 19 (37%)                                    | 19 (37%)         | 218 (53%)                           | 183 (54%)                                   | 185 (55%)        | 31 (50%)                            | 30 (52%)                                    | 32 (55%)         |
| Age                        | 0-5M     | 16 (12%)                            | 9 (7%)                                      | 9 (7%)           | 3 (5%)                              | 2 (4%)                                      | 3 (6%)           | 96 (24%)                            | 58 (17%)                                    | 49 (14%)         | 17 (27%)                            | 13 (22%)                                    | 11 (19%)         |
|                            | 6-11M    | 24 (18%)                            | 21 (17%)                                    | 24 (20%)         | 6 (11%)                             | 4 (8%)                                      | 3 (6%)           | 89 (22%)                            | 74 (22%)                                    | 78 (23%)         | 14 (23%)                            | 14 (24%)                                    | 15 (26%)         |
|                            | 1Y       | 44 (32%)                            | 41 (34%)                                    | 35 (29%)         | 19 (35%)                            | 19 (37%)                                    | 17 (33%)         | 94 (23%)                            | 85 (25%)                                    | 90 (27%)         | 11 (18%)                            | 11 (19%)                                    | 10 (17%)         |
|                            | 2Y       | 23 (17%)                            | 23 (19%)                                    | 23 (19%)         | 7 (13%)                             | 7 (14%)                                     | 9 (18%)          | 56 (14%)                            | 53 (16%)                                    | 56 (17%)         | 7 (11%)                             | 7 (12%)                                     | 10 (17%)         |
|                            | 3Y       | 15 (11%)                            | 14 (11%)                                    | 18 (15%)         | 16 (29%)                            | 16 (31%)                                    | 12 (24%)         | 45 (11%)                            | 42 (12%)                                    | 38 (11%)         | 5 (8%)                              | 5 (9%)                                      | 4 (7%)           |
|                            | 4Y       | 14 (10%)                            | 14 (11%)                                    | 13 (11%)         | 4 (7%)                              | 3 (6%)                                      | 7 (14%)          | 28 (7%)                             | 26 (8%)                                     | 27 (8%)          | 8 (13%)                             | 8 (14%)                                     | 8 (14%)          |
| Height-for-age Z-score     | ≥ -2     | 79 (58%)                            | 72 (59%)                                    | 79 (65%)         | 40 (73%)                            | 37 (73%)                                    | 38 (75%)         | 266 (65%)                           | 220 (65%)                                   | 221 (65%)        | 43 (69%)                            | 40 (69%)                                    | 42 (72%)         |
|                            | < -2     | 57 (42%)                            | 50 (41%)                                    | 43 (35%)         | 15 (27%)                            | 14 (27%)                                    | 13 (25%)         | 142 (35%)                           | 118 (35%)                                   | 117 (35%)        | 19 (31%)                            | 18 (31%)                                    | 16 (28%)         |
| Low birth weight           | <2,500 g | 14 (13%)                            | 11 (11%)                                    | 10 (9%)          | 4 (9%)                              | 3 (7%)                                      | 1 (2%)           | 54 (16%)                            | 35 (13%)                                    | 26 (8%)          | 5 (9%)                              | 5 (10%)                                     | 6 (11%)          |
| Socioeconomic status score | 37-93    | 40 (29%)                            | 34 (28%)                                    | 35 (29%)         | 12 (22%)                            | 10 (20%)                                    | 11 (22%)         | 114 (28%)                           | 91 (27%)                                    | 98 (29%)         | 11 (18%)                            | 9 (16%)                                     | 10 (17%)         |
|                            | 25-36    | 53 (39%)                            | 49 (40%)                                    | 52 (43%)         | 26 (47%)                            | 24 (47%)                                    | 22 (43%)         | 138 (34%)                           | 110 (33%)                                   | 109 (32%)        | 24 (39%)                            | 23 (40%)                                    | 23 (40%)         |
|                            | 0-24     | 43 (32%)                            | 34 (28%)                                    | 35 (29%)         | 17 (31%)                            | 10 (20%)                                    | 18 (35%)         | 156 (38%)                           | 91 (27%)                                    | 131 (39%)        | 27 (44%)                            | 9 (16%)                                     | 25 (43%)         |

Part 4

|                            |          | RhV-C                               | 87%                                         |                  | RSV                                 | 90%                                         |                  |
|----------------------------|----------|-------------------------------------|---------------------------------------------|------------------|-------------------------------------|---------------------------------------------|------------------|
|                            |          | "children with preceding infection" | matched "children with preceding infection" | matched controls | "children with preceding infection" | matched "children with preceding infection" | matched controls |
| Total number               |          | 324                                 | 281                                         | 281              | 479                                 | 430                                         | 430              |
| Gender                     | Female   | 149 (46%)                           | 138 (49%)                                   | 135 (48%)        | 245 (51%)                           | 221 (51%)                                   | 221 (51%)        |
|                            | Male     | 175 (54%)                           | 143 (51%)                                   | 146 (52%)        | 234 (49%)                           | 209 (49%)                                   | 209 (49%)        |
| Age                        | 0-5M     | 47 (15%)                            | 28 (10%)                                    | 24 (9%)          | 71 (15%)                            | 45 (10%)                                    | 43 (10%)         |
|                            | 6-11M    | 69 (21%)                            | 56 (20%)                                    | 55 (20%)         | 74 (15%)                            | 65 (15%)                                    | 70 (16%)         |
|                            | 1Y       | 88 (27%)                            | 83 (30%)                                    | 83 (30%)         | 155 (32%)                           | 146 (34%)                                   | 146 (34%)        |
|                            | 2Y       | 58 (18%)                            | 54 (19%)                                    | 57 (20%)         | 78 (16%)                            | 77 (18%)                                    | 73 (17%)         |
|                            | 3Y       | 29 (9%)                             | 28 (10%)                                    | 29 (10%)         | 53 (11%)                            | 51 (12%)                                    | 55 (13%)         |
|                            | 4Y       | 33 (10%)                            | 32 (11%)                                    | 33 (12%)         | 48 (10%)                            | 46 (11%)                                    | 43 (10%)         |
| Height-for-age Z-score     | ≥ -2     | 224 (69%)                           | 195 (69%)                                   | 198 (70%)        | 334 (70%)                           | 302 (70%)                                   | 307 (71%)        |
|                            | < -2     | 100 (31%)                           | 86 (31%)                                    | 83 (30%)         | 145 (30%)                           | 128 (30%)                                   | 123 (29%)        |
| Low birth weight           | <2,500 g | 31 (11%)                            | 22 (9%)                                     | 20 (8%)          | 46 (12%)                            | 32 (9%)                                     | 31 (8%)          |
| Socioeconomic status score | 37-93    | 83 (26%)                            | 74 (26%)                                    | 79 (28%)         | 132 (28%)                           | 118 (27%)                                   | 117 (27%)        |
|                            | 25-36    | 122 (38%)                           | 107 (38%)                                   | 105 (37%)        | 184 (38%)                           | 160 (37%)                                   | 159 (37%)        |
|                            | 0-24     | 119 (37%)                           | 74 (26%)                                    | 97 (35%)         | 163 (34%)                           | 118 (27%)                                   | 154 (36%)        |

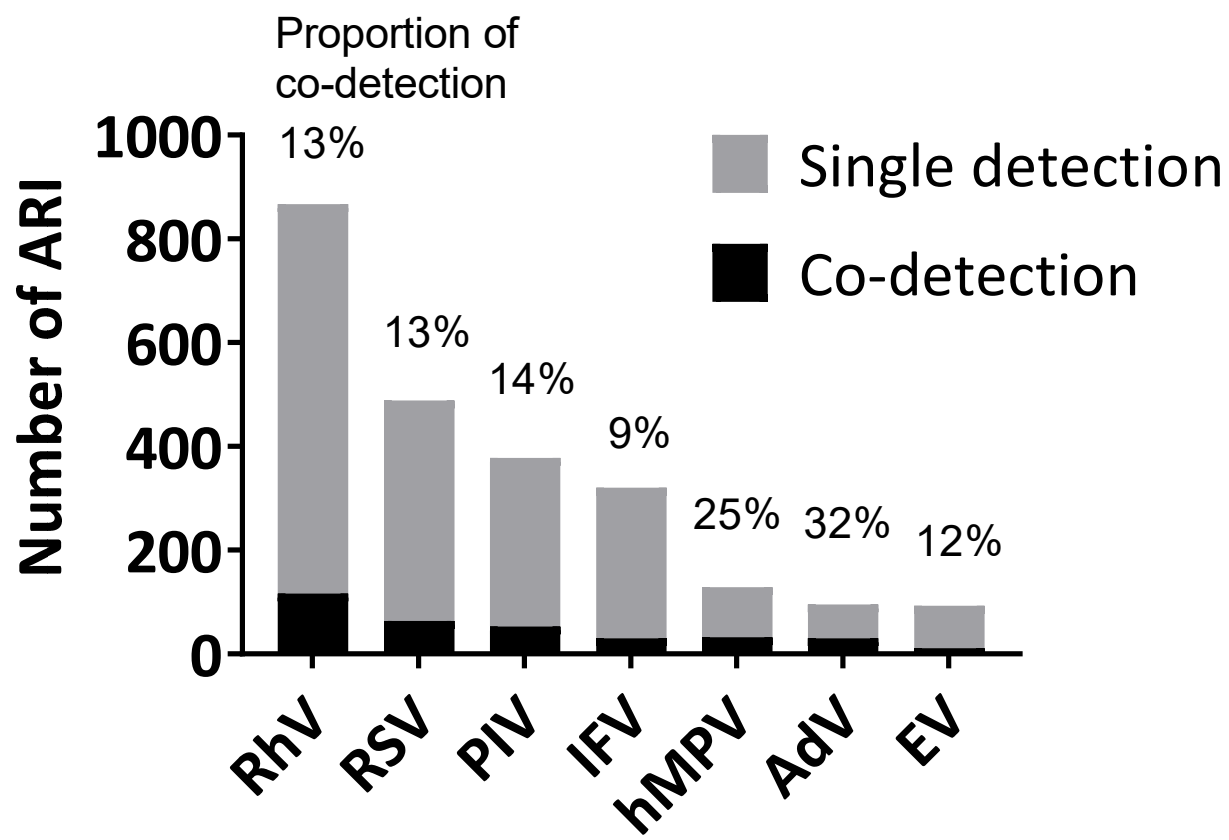

Supplementary Figure 1: Number of virus-positive ARIs detected in this study.

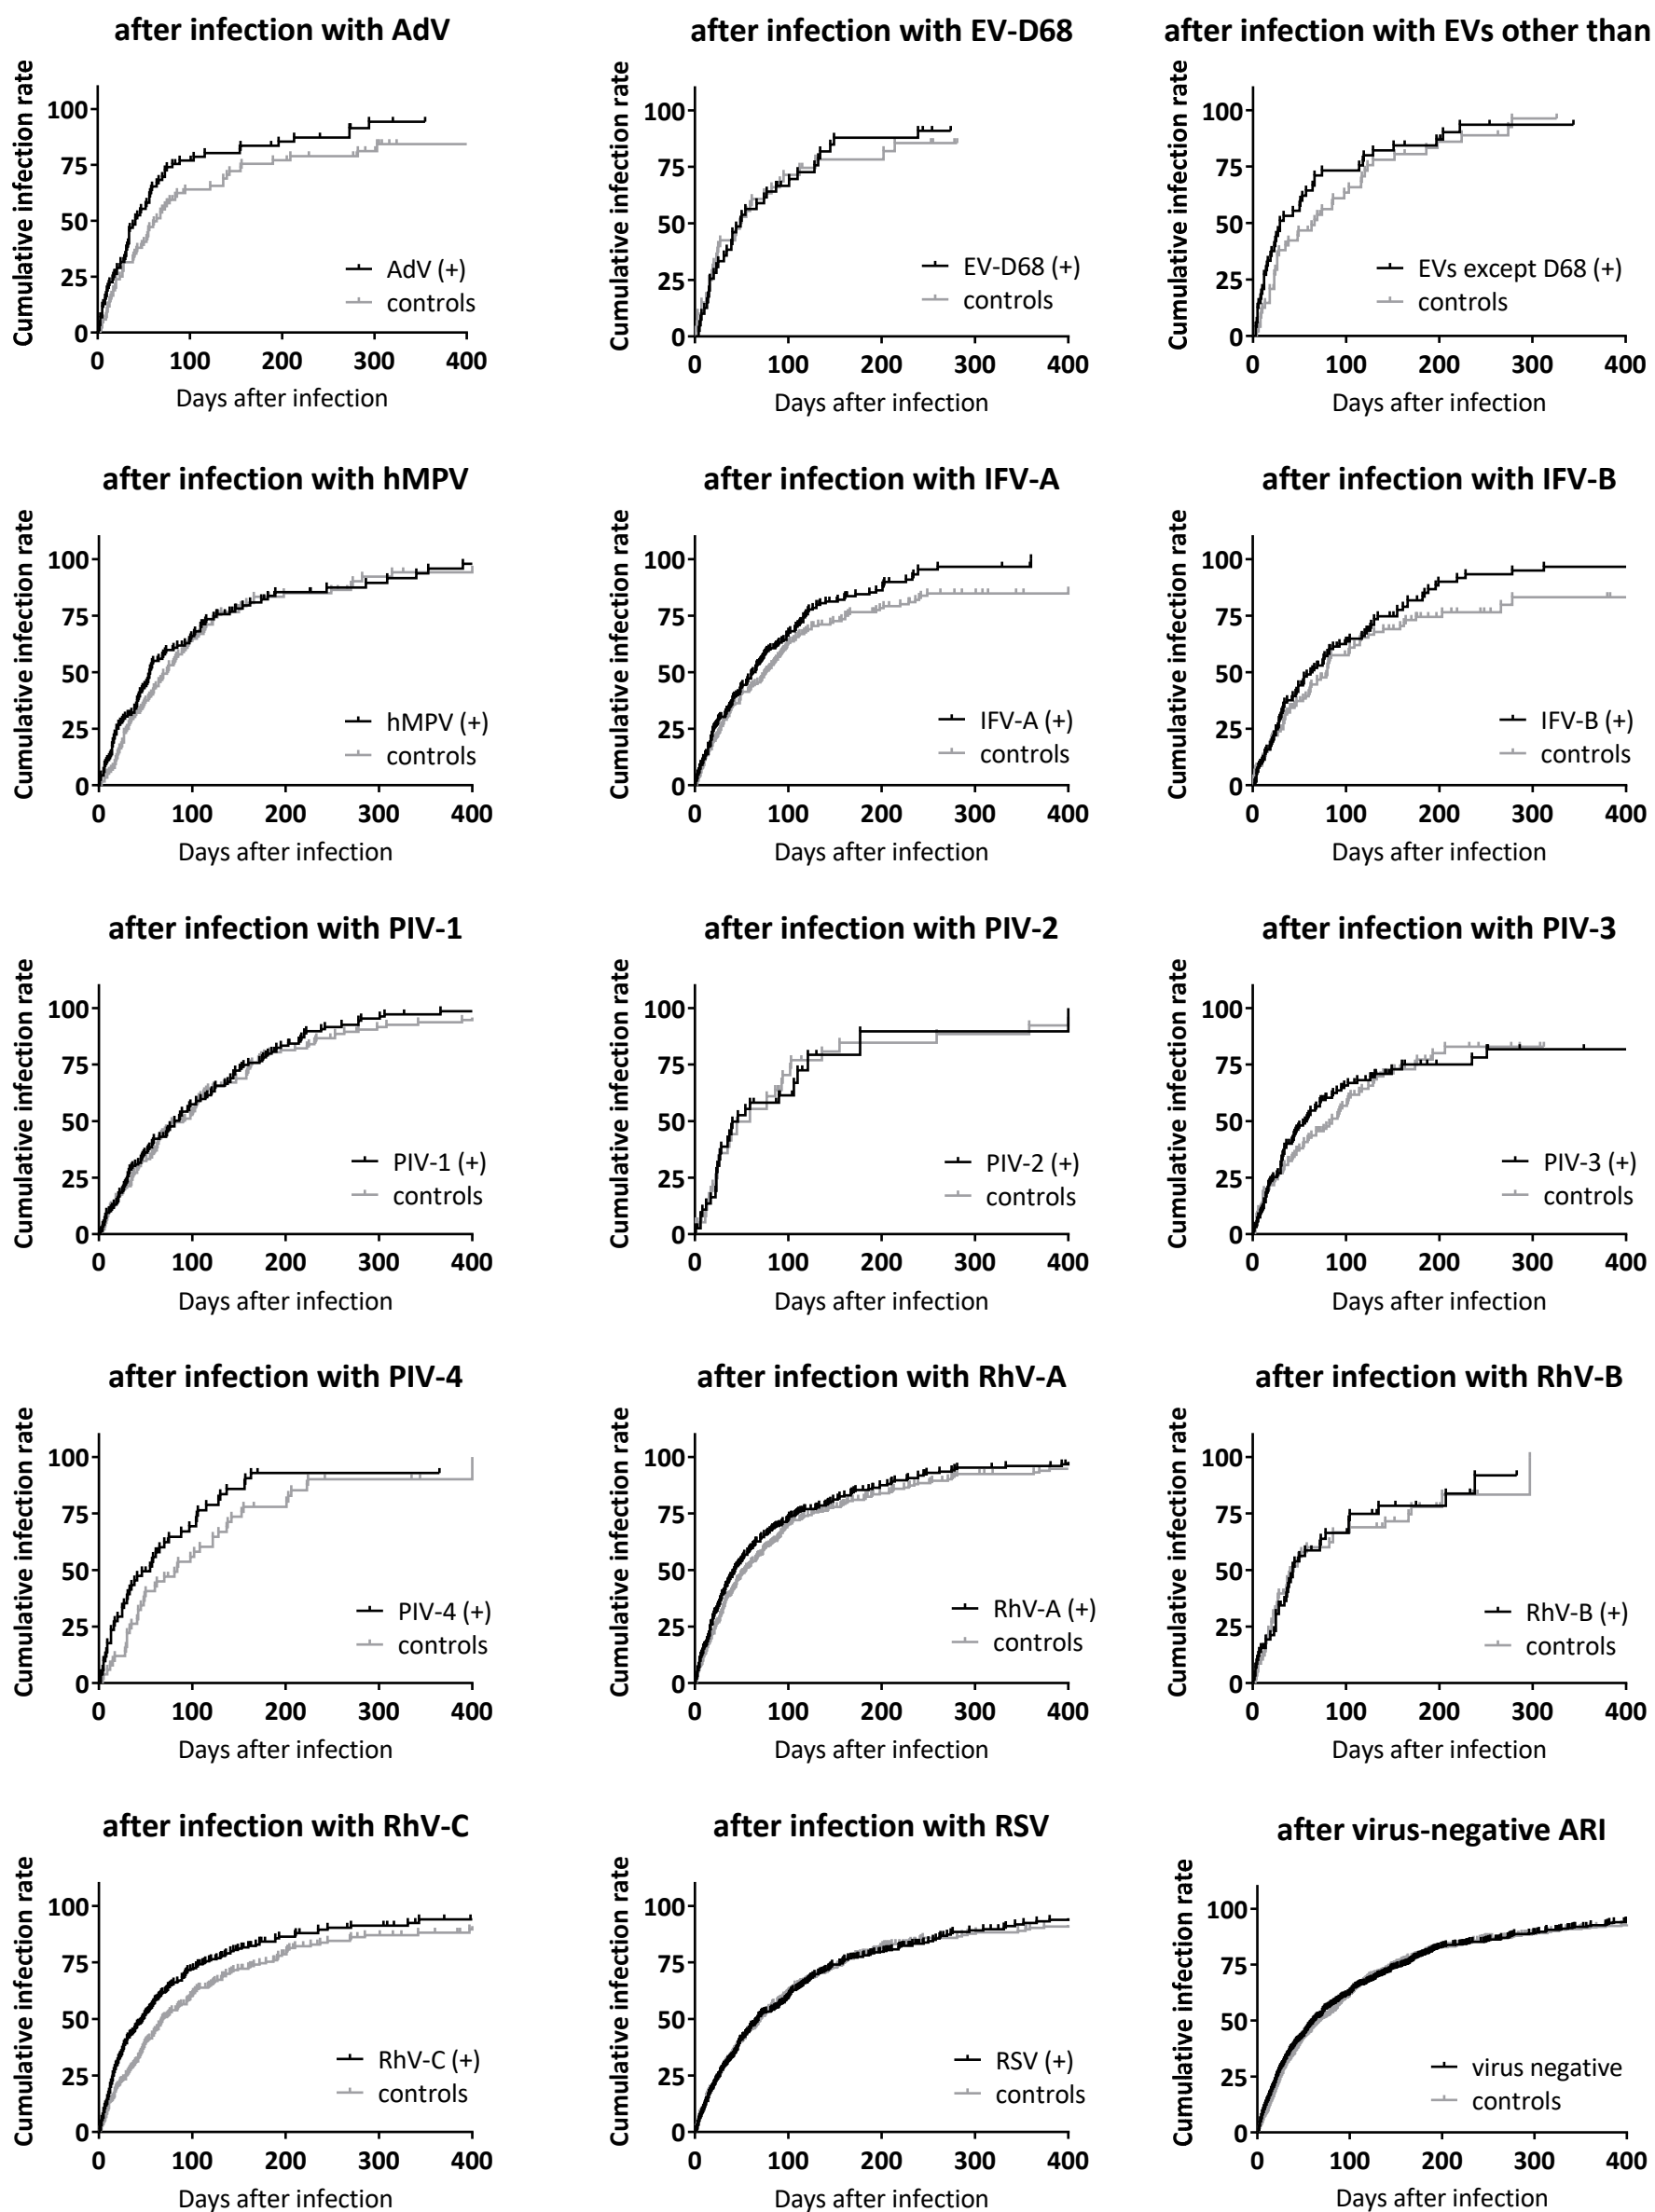

**Supplementary Figure 2:** Preceding viral infections and subsequent ARIs; Kaplan–Meier curves for all viruses.

Cumulative infection rates by Kaplan–Meier curves are shown for subsequent ARIs after preceding infections and ARIs in matched controls during the corresponding period.

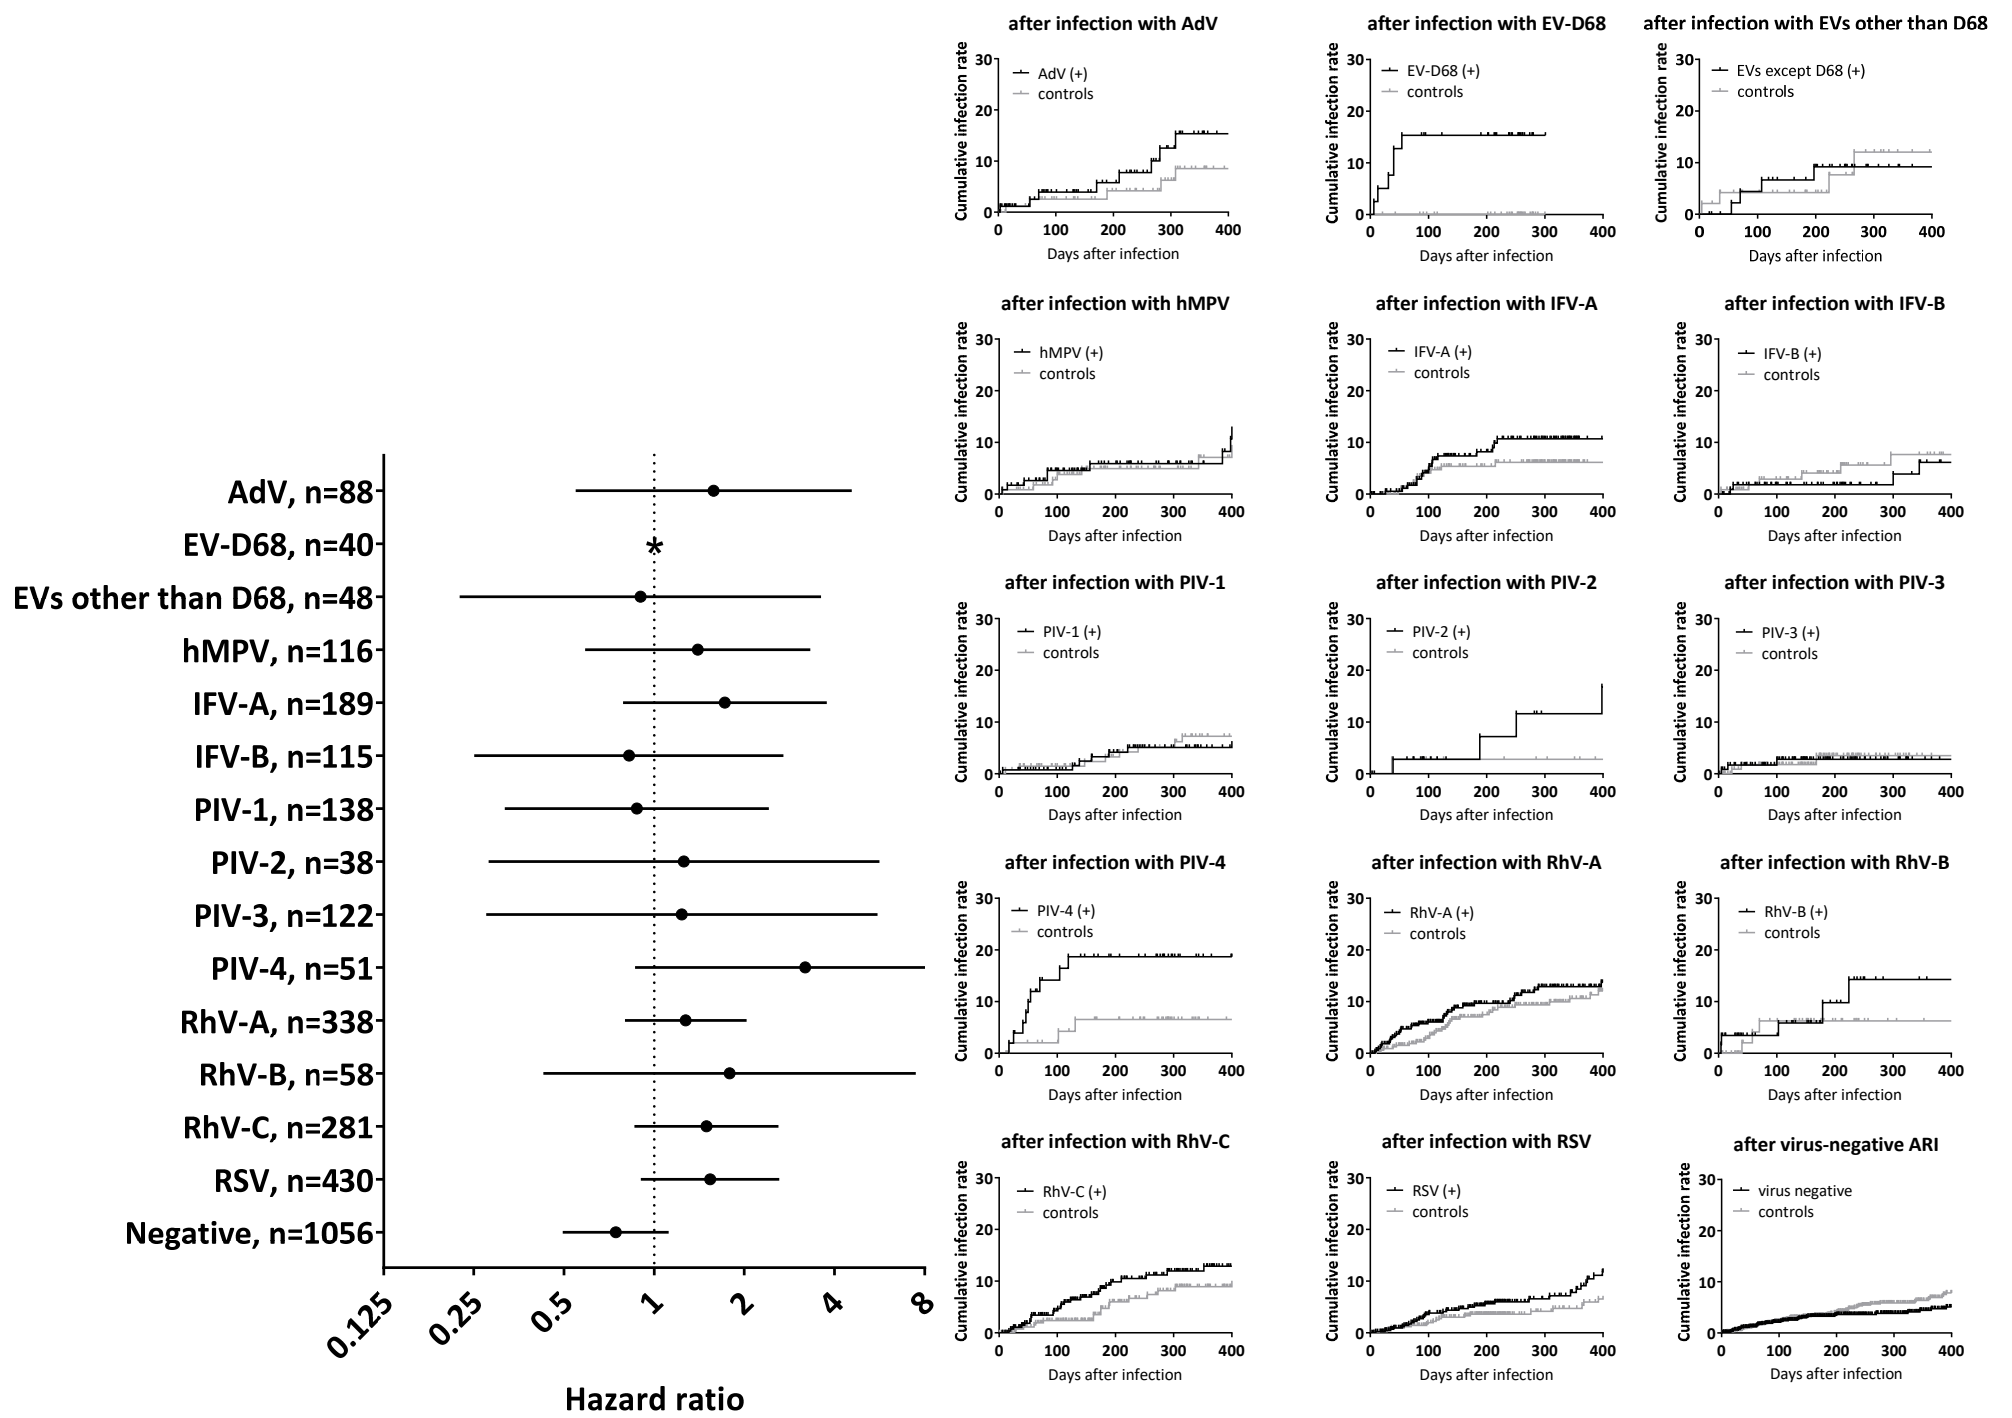

**Supplementary Figure 3: Preceding viral infections and subsequent severe ARIs.**

(A) Hazard ratios and 95% confidence intervals determined using Cox proportional hazards regression analysis are shown for subsequent severe ARIs after preceding infections compared with the first severe ARIs during the corresponding time for matched controls. A log scale was used for hazard ratios. (B) Cumulative infection rates by Kaplan–Meier curves are shown for subsequent severe ARIs after preceding infections and severe ARIs in matched controls during the corresponding period. \*, not calculated because of the limited number of events.



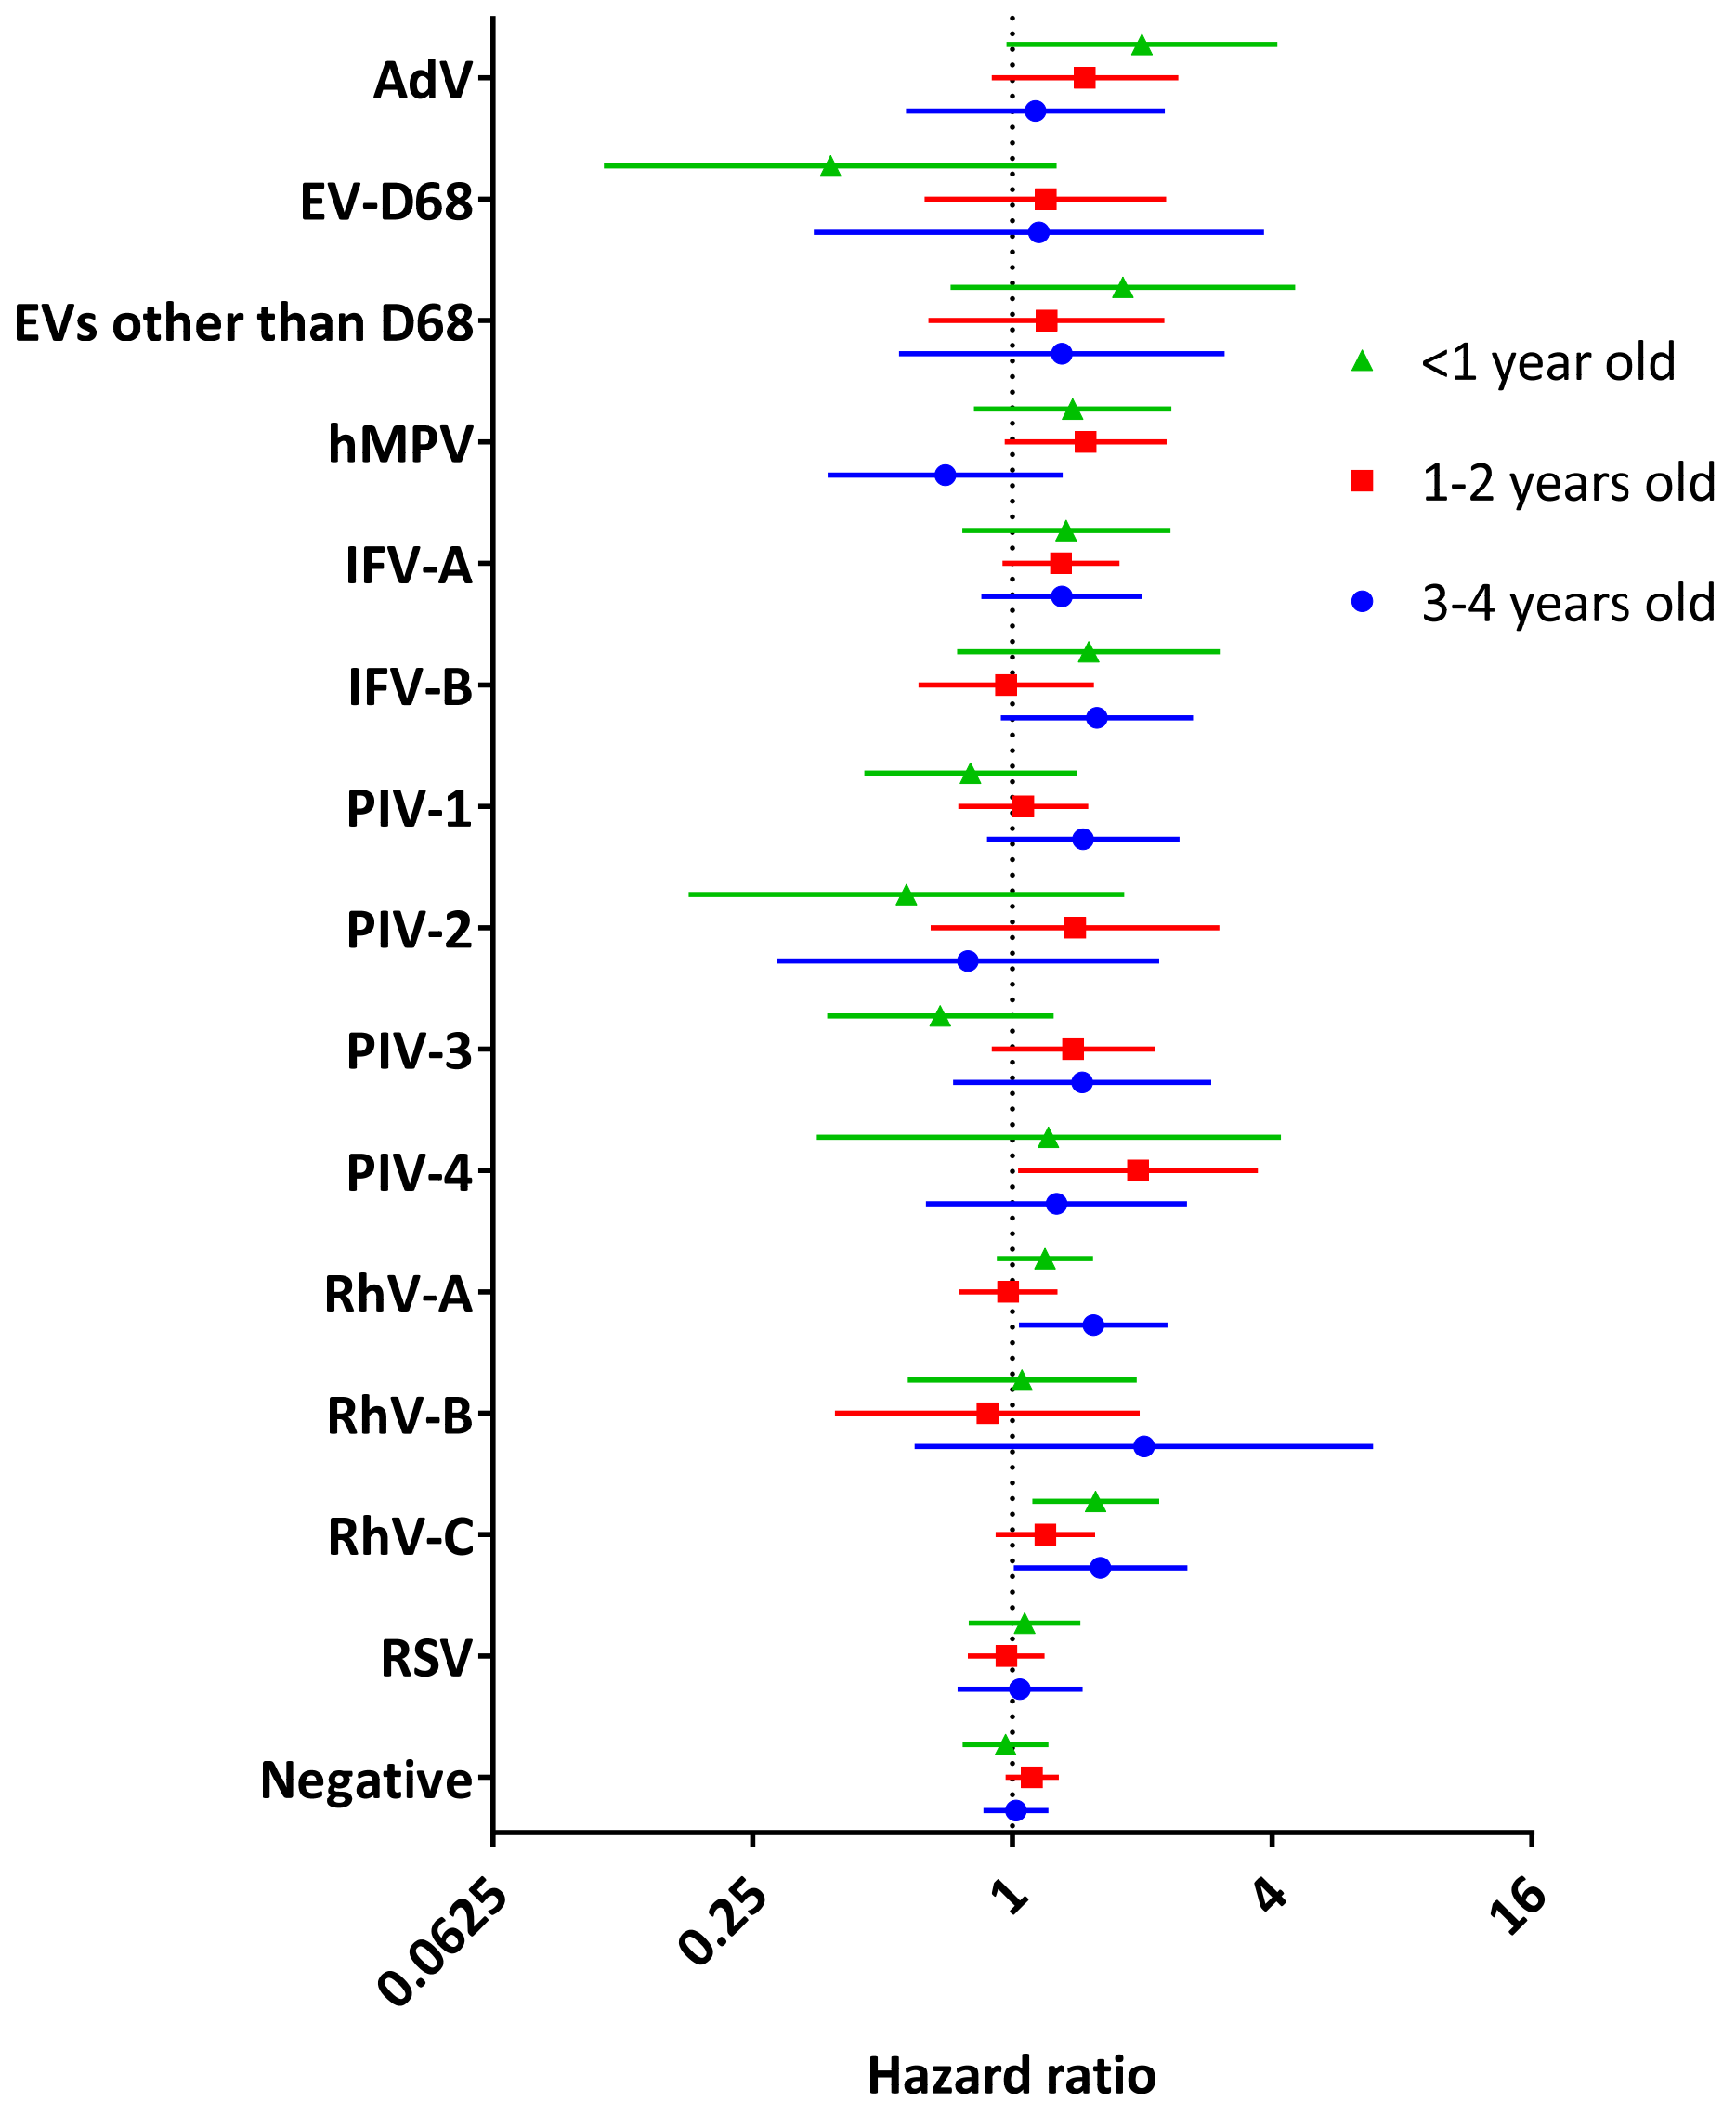

**Supplementary Figure 4:** Preceding viral infections and subsequent ARIs by age group.

Hazard ratios and 95% confidence intervals determined using Cox proportional hazards regression analysis by age group are shown for all subsequent ARIs after preceding infections compared with the first ARIs during the corresponding time for matched controls. A log scale was used for hazard ratios.
